# Supplementary material for: Isolation and antitumor efficacy evaluation of a polysaccharide from Nostoc commune Vauch.
Source: Royal Society of Chemistry journal article supplement (doi:10.1039/c5fo00471c), 2015-01-01
Supplement: c5fo00471c1.pdf [file c5fo00471c1.pdf]

## Supplementary Information

### Isolation and antitumor efficacy evaluation of a polysaccharide from *Nostoc commune* Vauch.

Min Guo<sup>a,1</sup>, Guo-Bin Ding<sup>a,1</sup>, Songjia Guo<sup>a</sup>, Zhuoyu Li<sup>a,b,\*</sup>, Liangqi Zhao<sup>a</sup>, Ke Li<sup>c</sup>,  
Xiangrong Guo<sup>d</sup>

<sup>a</sup> Institute of Biotechnology, the Key Laboratory of Chemical Biology and Molecular Engineering of Ministry of Education, Shanxi University, Taiyuan 030006, People's Republic of China

<sup>b</sup> College of Life Science, Zhejiang Chinese Medical University, Hangzhou 310053, People's Republic of China

<sup>c</sup> Modern Research Center for Traditional Chinese Medicine, Shanxi University, Taiyuan 030006, People's Republic of China

<sup>d</sup> Clinical Laboratory, Shanxi Coal Center Hospital, Taiyuan 030006, People's Republic of China

<sup>1</sup> Both these authors contributed equally to this work.

Corresponding author: Prof. Zhuoyu Li

E-mail addresses: lzy@sxu.edu.cn.

Tel.: +86-351-7018268; Fax: +86-351-7018268.

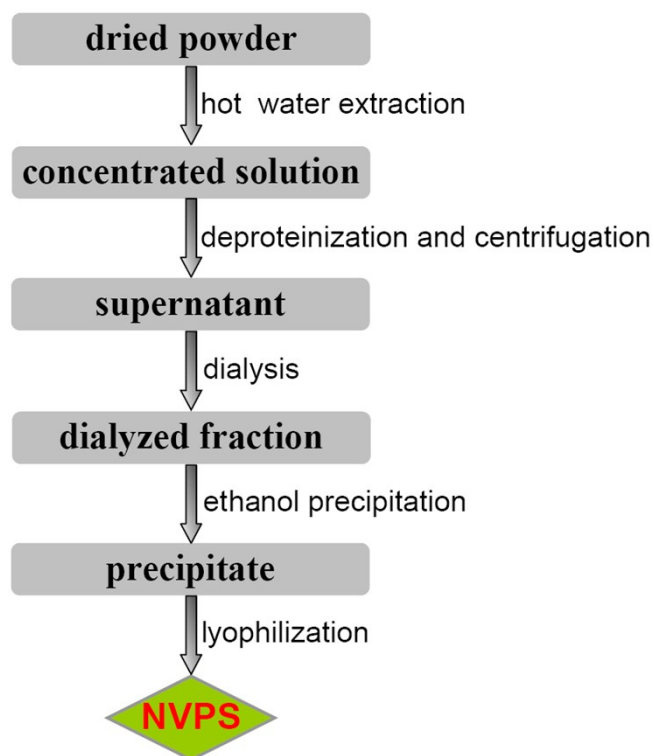

**Figure S1.** Steps involved in the extraction and purification of polysaccharides from *Nostoc commune* Vauch. (NVPS).

**Table S1** Monosaccharide compositions of NVPS<sup>a</sup>.

| Neutral sugar | Monosaccharide composition in NVPS (mol) |
|---------------|------------------------------------------|
| Rhamnose      | — <sup>b</sup>                           |
| Fucose        | — <sup>b</sup>                           |
| Arabinose     | 4.96±0.17                                |
| Xylose        | 182.05±0.32                              |
| Mannose       | 0.97±0.41                                |
| Glucose       | 1                                        |
| Galactose     | 3.15±0.09                                |

<sup>a</sup> Values are expressed as means ± SD and three replicated independent determinations.

<sup>b</sup> Not detectable.

**Table S2** Cytotoxic activity of NVPS against various human cell lines.

| Cell lines                | IC <sub>50</sub> (mg/mL) |
|---------------------------|--------------------------|
| MCF7 (Breast cancer cell) | 0.067±0.004              |
| DLD1 (Colon cancer cell)  | 0.11±0.02                |

MCF7 and DLD1 cells were incubated with various doses of NVPS for 36 and 48 h, respectively, and subjected to MTT assays to measure IC<sub>50</sub> values.
